# Supplementary material for: Fluorescence sensing of metal ions in solution using a morpholine-containing phenolic Mannich base of 1′-hydroxy-2′-acetonaphthone
Source: Royal Society of Chemistry journal article supplement (doi:10.1039/d4ra07200f), 2024-01-01
Supplement: d4ra07200f1.pdf [file d4ra07200f1.pdf]

## Supplementary Information

### Fluorescence sensing of metal ions in solution by a morpholine-containing phenolic

### Mannich base of 1'-hydroxy-2'-acetonaphthone

Andreea Laura Chibac-Scutaru<sup>1,\*</sup>, Gheorghe Roman<sup>2</sup>

<sup>1</sup>Petru Poni Institute of Macromolecular Chemistry, Department of Polyaddition and Photochemistry, Iași, 700487, Romania; [andreea.chibac@icmpp.ro](mailto:andreea.chibac@icmpp.ro); ORCID: 0000-0003-3503-0237.

<sup>2</sup>Petru Poni Institute of Macromolecular Chemistry, Department of Inorganic Polymers, Iași, 700487, Romania; [gheorghe.roman@icmpp.ro](mailto:gheorghe.roman@icmpp.ro); ORCID: 0000-0003-0939-1899.

\*Correspondence: [andreea.chibac@icmpp.ro](mailto:andreea.chibac@icmpp.ro) (ALCS).

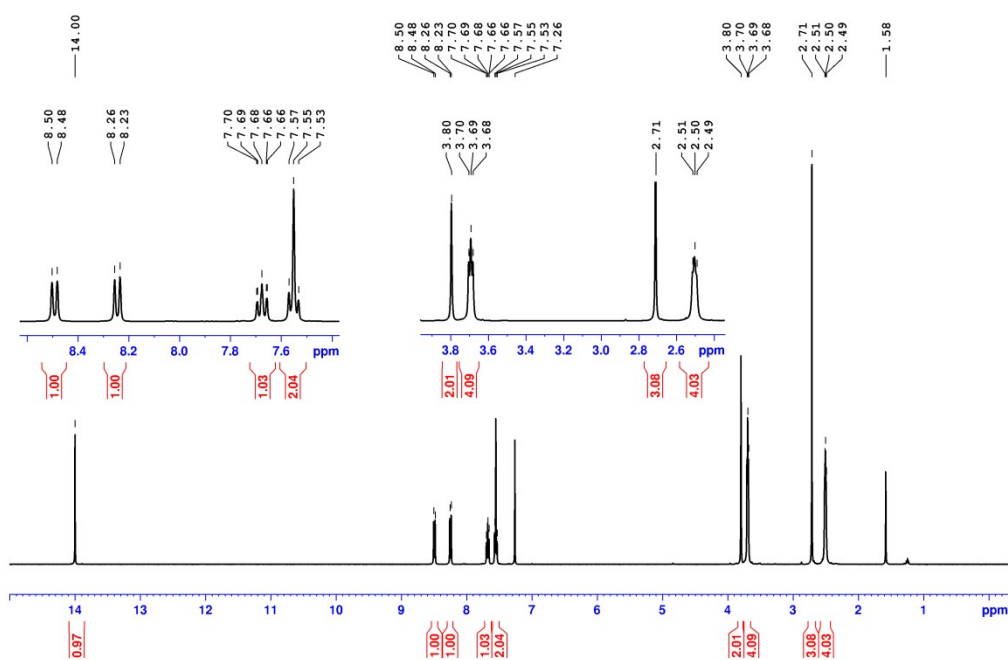

Figure S1. <sup>1</sup>H NMR spectrum of compound 1.

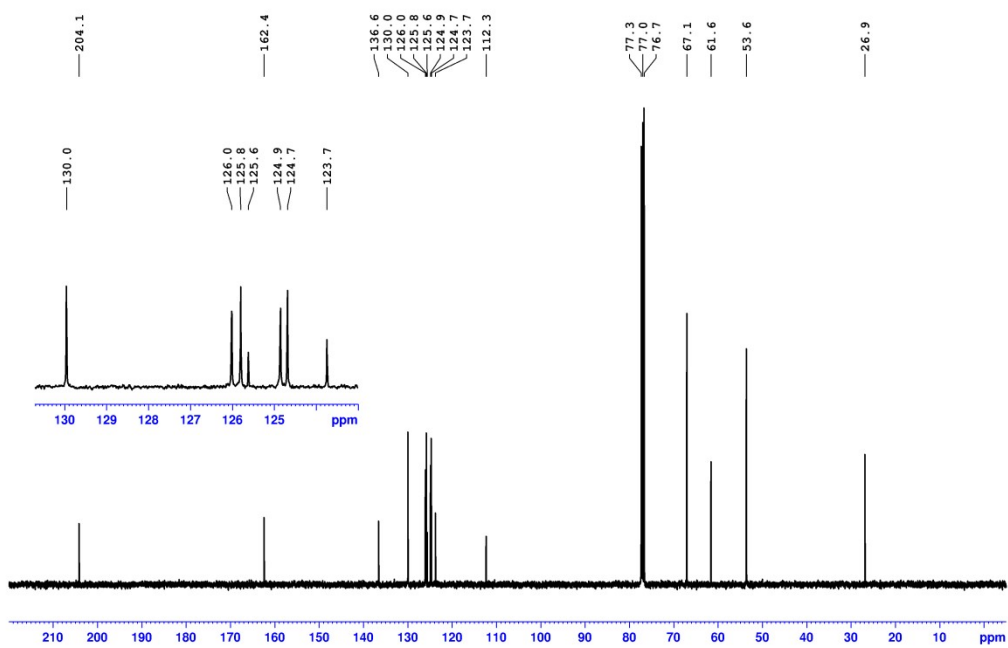

**Figure S2.**  $^{13}\text{C}$  NMR spectrum of compound **1**.

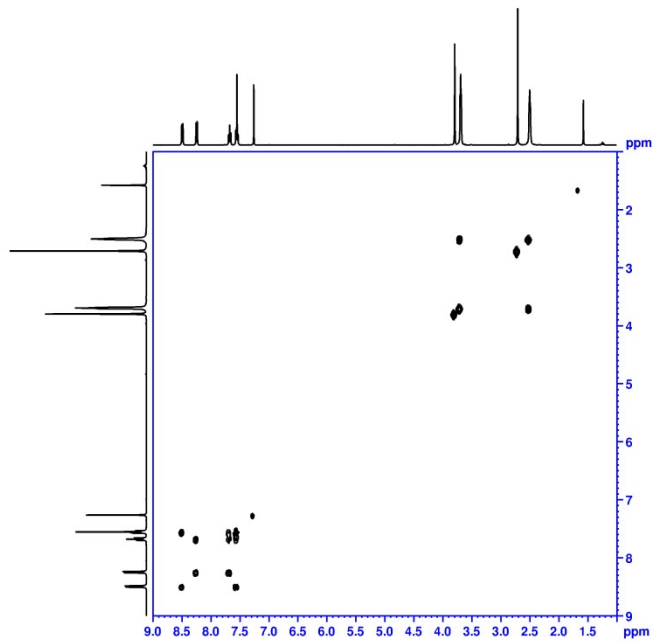

**Figure S3.** H,H-COSY spectrum of compound **1**.

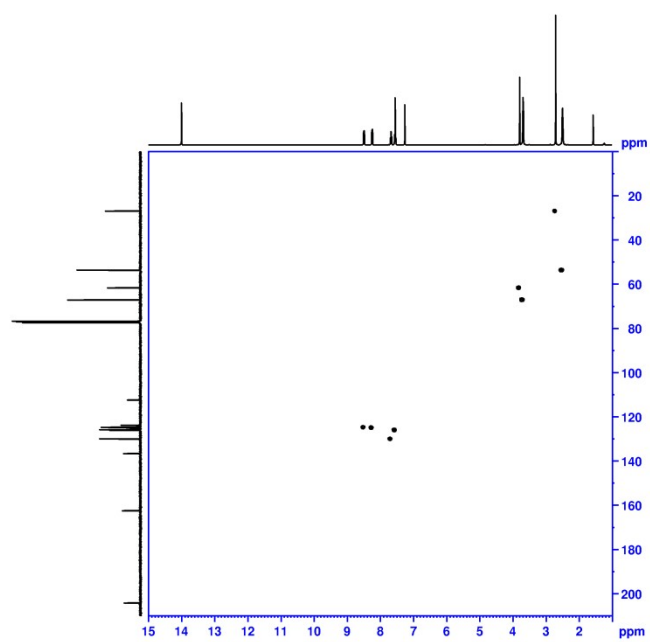

**Figure S4.** H,C-HSQC spectrum of compound **1**.

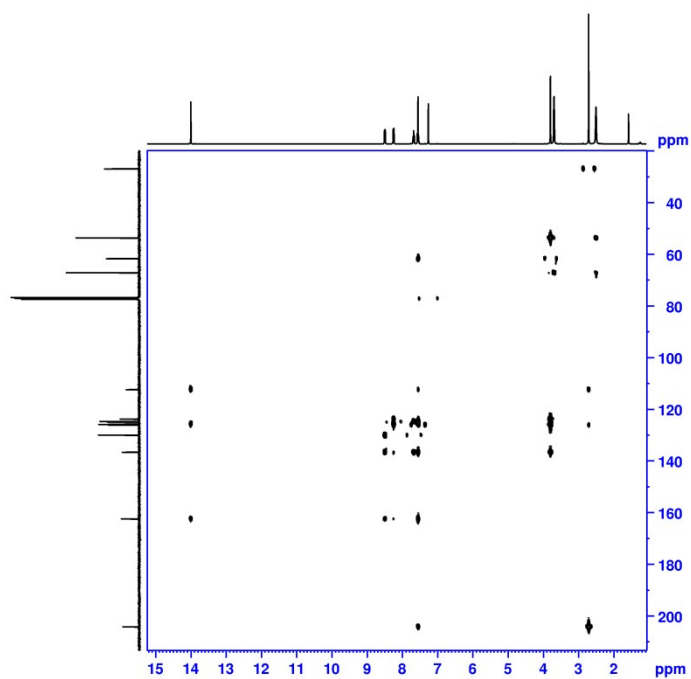

**Figure S5.** H,C-HMBC spectrum of compound **1**.

**Table S1.** Photophysical properties of compound **1** compared to those of HAN in methanol.

| compound   | $\lambda_{\text{abs}}$ (nm) | $\epsilon$ ( $\text{M}^{-1} \text{cm}^{-1}$ ) <sup>a</sup> | $\lambda_{\text{em}}$ (nm) | $\Phi$ (%) |
|------------|-----------------------------|------------------------------------------------------------|----------------------------|------------|
| <b>1</b>   | 287; 298; 310; 368          | 5158                                                       | 475                        | 2.91       |
| <b>HAN</b> | 283; 293; 305; 363          | 4385                                                       | 473                        | 2.44       |

<sup>a</sup>The value for the molar extinction coefficient ( $\epsilon$ ) is determined for compound **1** at  $\lambda_{\text{abs}} = 368$  nm and for HAN at  $\lambda_{\text{abs}} = 363$  nm.

**Table S2.** Decay components and their contribution to the fluorescence lifetime of compound **1** ( $10^{-4}$  M) in presence of different  $\text{Al}^{3+}$  concentrations. The decays were monitored at 475 nm ( $\lambda_{\text{exc}} = 375$  nm).

| $[\text{Al}^{3+}]$ (M) | $\tau_1$ (ns) | $A_1$ (%) | $\tau_2$ (ns) | $A_2$ (%) | $\langle \tau_F \rangle$ (ns)* |
|------------------------|---------------|-----------|---------------|-----------|--------------------------------|
| 0                      | 0.2383        | 83.12     | 4.1509        | 16.88     | 3.2886                         |
| $0.5 \times 10^{-4}$   | 0.2943        | 39.51     | 6.9943        | 60.49     | 6.8151                         |
| $1.0 \times 10^{-4}$   | 0.3791        | 30.41     | 8.2081        | 69.59     | 8.0532                         |
| $1.5 \times 10^{-4}$   | 0.4469        | 22.70     | 8.4847        | 77.30     | 8.3623                         |
| $2.0 \times 10^{-4}$   | 0.5751        | 20.66     | 8.6751        | 79.34     | 8.6275                         |
| $2.5 \times 10^{-4}$   | 0.7973        | 18.96     | 8.8093        | 81.04     | 8.6432                         |

\*The effective average lifetime ( $\tau_F$ ) was calculated using the equation given in J.R. Lakowicz, Principles of Fluorescence Spectroscopy, Springer, Boston, 2006:

$$\langle \tau_F \rangle = \frac{(A_1(\tau_1)^2 + A_2(\tau_2)^2)}{A_1\tau_1 + A_2\tau_2}$$

**Table S3.** Decay components and their contribution to the fluorescence lifetime of compound **1** ( $10^{-4}$  M) in presence of different  $\text{Cu}^{2+}$  concentrations. The decays were monitored at 475 nm ( $\lambda_{\text{exc}} = 375$  nm).

| $[\text{Cu}^{2+}]$ (M) | $\tau_1$ (ns) | $A_1$ (%) | $\tau_2$ (ns) | $A_2$ (%) | $\langle \tau_F \rangle$ (ns)* |
|------------------------|---------------|-----------|---------------|-----------|--------------------------------|
| 0                      | 0.2383        | 83.12     | 4.1509        | 16.88     | 3.2886                         |
| $0.5 \times 10^{-4}$   | 0.2419        | 74.63     | 4.70054       | 25.37     | 4.1190                         |
| $1.0 \times 10^{-4}$   | 0.2912        | 66.45     | 5.3647        | 33.55     | 4.8722                         |
| $1.5 \times 10^{-4}$   | 0.2948        | 64.57     | 5.3321        | 35.43     | 4.8710                         |
| $2.0 \times 10^{-4}$   | 0.2904        | 64.00     | 5.4405        | 36.00     | 4.9941                         |
| $2.5 \times 10^{-4}$   | 0.2948        | 64.11     | 5.5568        | 35.89     | 5.1013                         |

\*The effective average lifetime ( $\tau_F$ ) was calculated using the equation given in J.R. Lakowicz, Principles of Fluorescence Spectroscopy, Springer, Boston, 2006:

$$\langle \tau_F \rangle = \frac{A_1(\tau_1)^2 + A_2(\tau_2)^2}{A_1\tau_1 + A_2\tau_2}$$

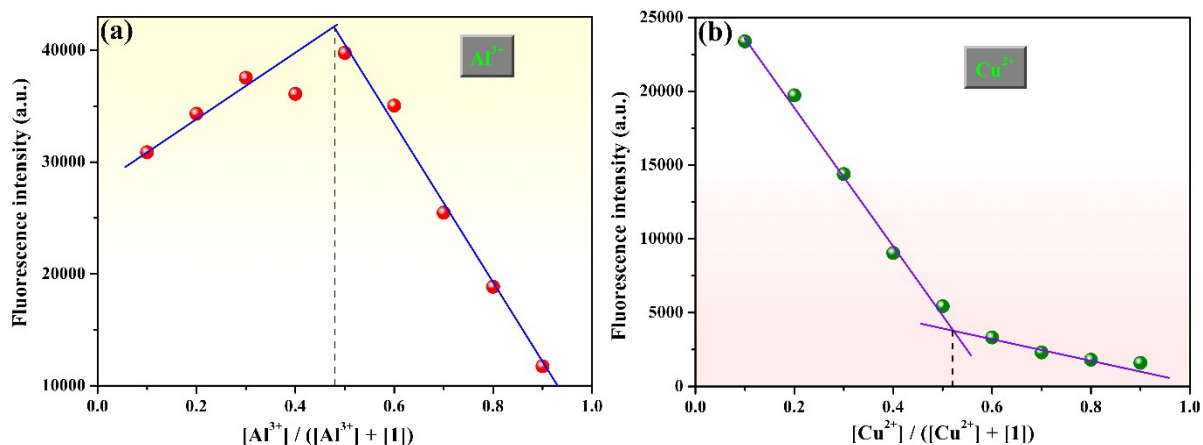

**Figure S6.** Job's plot for complexation of compound **1** with (a)  $\text{Al}^{3+}$  and (b)  $\text{Cu}^{2+}$  in methanol–water (85:15, v/v).

## Determination of association constant ( $K_a$ )

The association constant ( $K_a$ ) was obtained from fluorescence titration data according to the Benesi–Hildebrand equation:

$$\frac{1}{I - I_0} = \frac{1}{K_a[C](I_{max} - I)} + \frac{1}{I_{max} - I_0}$$

where,  $I$  is fluorescence intensity of compound **1** ( $\lambda_{em} = 475$  nm) in the presence of a given concentration of  $Al^{3+}$ ,  $I_0$  and  $I_{max}$  represents initial fluorescence intensity of sensor **1** in the absence of  $Al^{3+}$  and the fluorescence intensity of sensor **1** in the presence of the highest concentration of  $Al^{3+}$ , respectively;  $K_a$  is the association constant, and  $C$  is the concentration of  $Al^{3+}$ .

For fluorescence quenching in presence of  $Cu^{2+}$ , a slightly modified equation was used:

$$\frac{1}{I - I_0} = \frac{1}{K_a[C](I_{min} - I_0)} + \frac{1}{I_{min} - I_0}$$

where  $I_{min}$  is intensity of compound **1** in the presence of the highest concentration of  $Cu^{2+}$ .

The values of intercept and slope were taken from the plot of  $(I_{max} - I_0) / (I - I_0)$  versus  $I/[Al^{3+}]$  for **1**- $Al^{3+}$  complex (Fig. S7a) and from the plot of  $(I_{min} - I_0) / (I - I_0)$  versus  $I/[Cu^{2+}]$  for **1**- $Cu^{2+}$  complex (Fig. S7b).

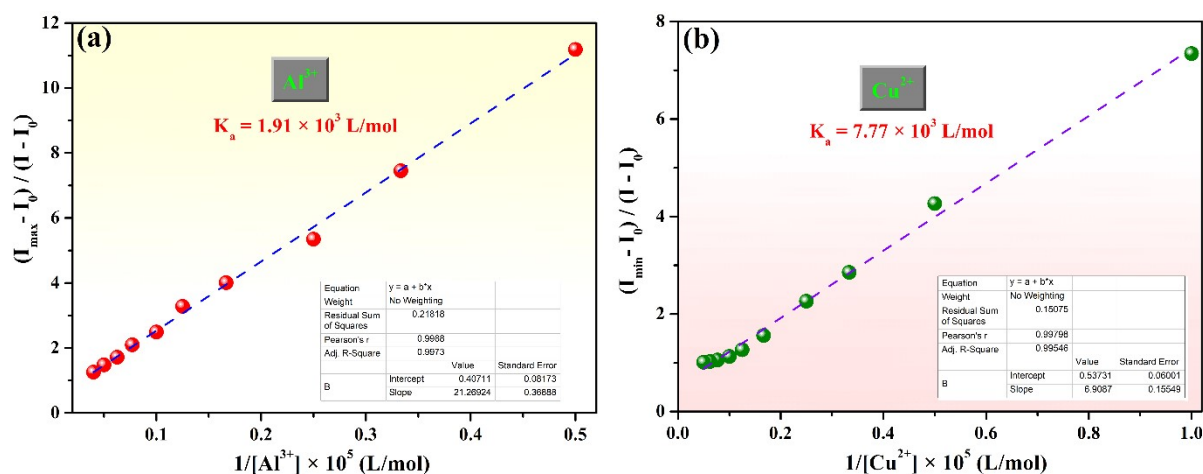

**Figure S7.** Benesi–Hildebrand plots for the determination of the association constants ( $K_a$ ) for the complexation of compound **1** ( $10^{-4}$  M) with (a)  $Al^{3+}$  and (b)  $Cu^{2+}$ .
